# Supplementary material for: Novel strategy to prepare pure Cu4TiSe4 and its high-pressure Raman and thermoelectric performance investigation
Source: Royal Society of Chemistry journal article supplement (doi:10.1039/d5qi00707k), 2025-01-01
Supplement: d5qi00707k1.pdf [file d5qi00707k1.pdf]

## **Supplement Materials**

### **Novel Strategy to Prepare Pure Cu<sub>4</sub>TiSe<sub>4</sub> and Its High-Pressure Raman and Thermoelectric Performance Investigation**

Guangfeng Zhang <sup>a</sup>, Tonghan Yang <sup>b</sup>, Wei He <sup>a,\*</sup>, Zhikai Zhu <sup>c</sup>, Hui Luo <sup>a</sup>, Shuohai Fang <sup>a</sup>, Changzhong Liao <sup>a,\*</sup>

<sup>a</sup> State Key Laboratory of Featured Metal Materials and Life-cycle Safety for Composite Structures, MOE Key Laboratory of New Processing Technology for Nonferrous Metals and Materials, School of Resources, Environment and Materials, Guangxi University, Nanning 530004, China

<sup>b</sup> Guangxi Key Laboratory of Advanced Structural Materials and Carbon Neutralization, School of Materials and Environment, Guangxi Minzu University, Nanning 530105, China

<sup>c</sup> Center for High Pressure Science and Technology Advanced Research (HPSTAR), Shanghai 201203, China

\*Corresponding author:

Dr. Changzhong Liao, E-mail: [liaocz29@connect.hku.hk](mailto:liaocz29@connect.hku.hk)

Professor Wei He, E-mail: [wei\\_he@gxu.edu.cn](mailto:wei_he@gxu.edu.cn)

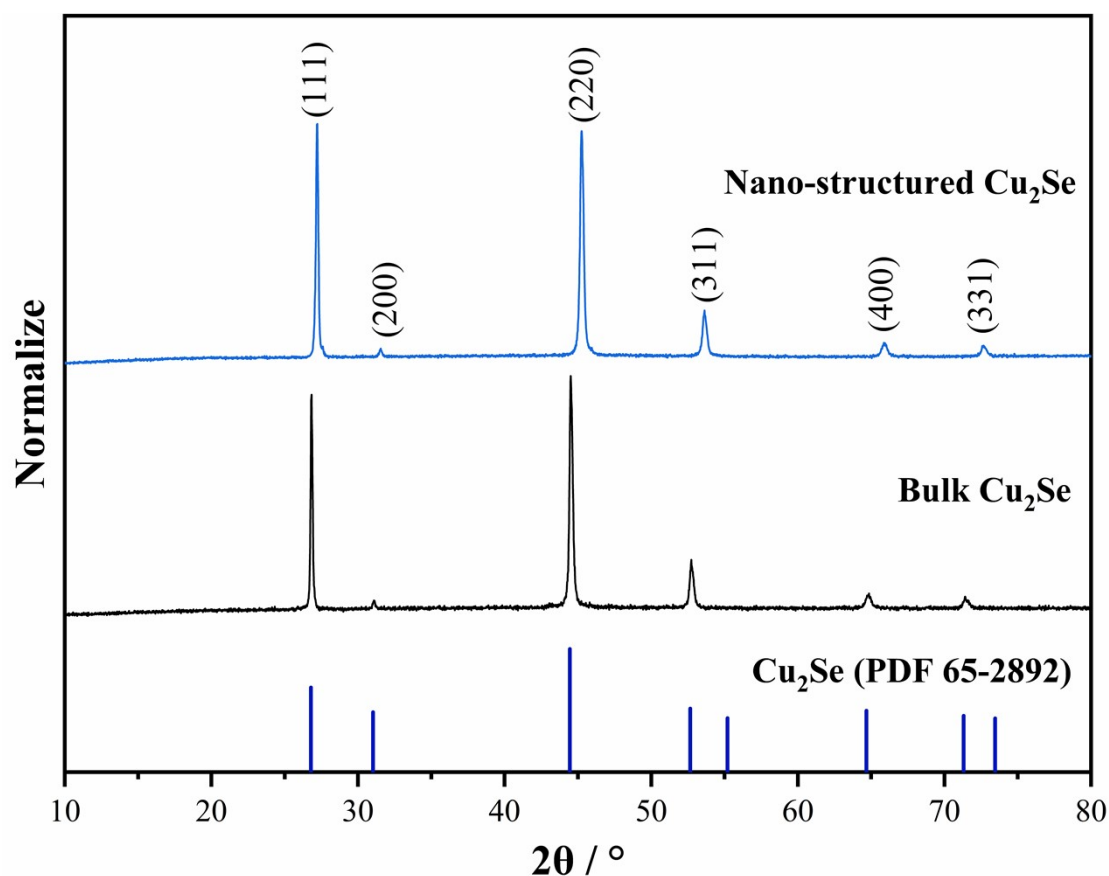

Figure S1 XRD patterns of  $\text{Cu}_2\text{Se}$  after different treatments in comparison with the standard card.

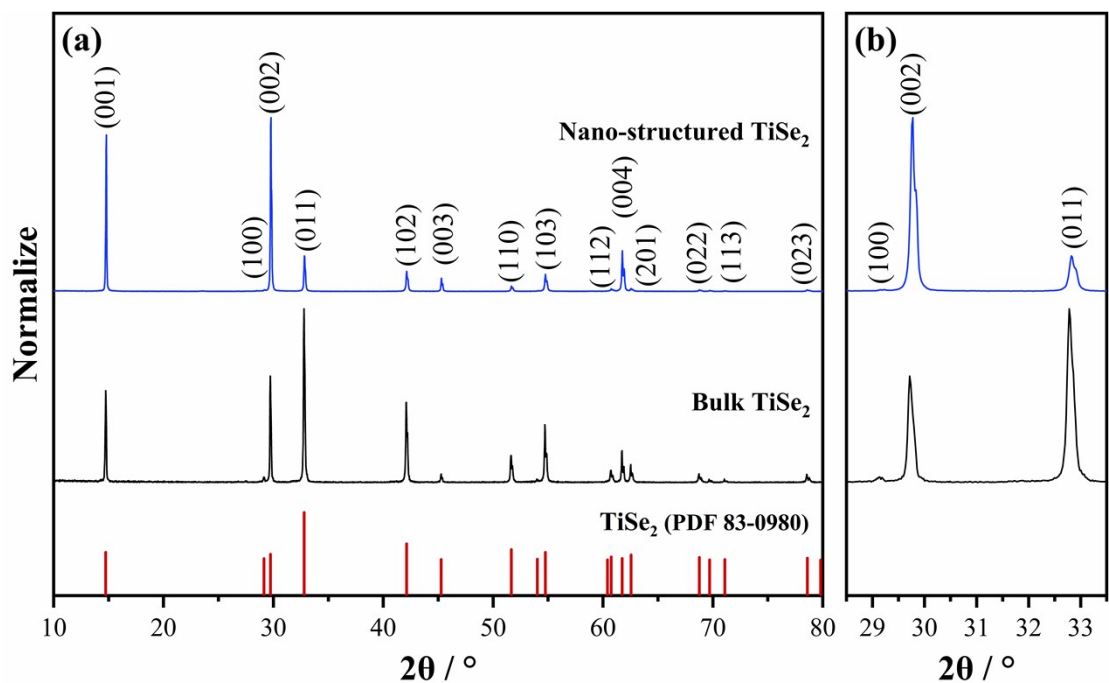

Figure S2 (a) XRD patterns of  $\text{TiSe}_2$  under different treatments in comparison with the standard card. (b) Amplified X-ray diffraction patterns at  $2\theta = 28\text{--}34^\circ$

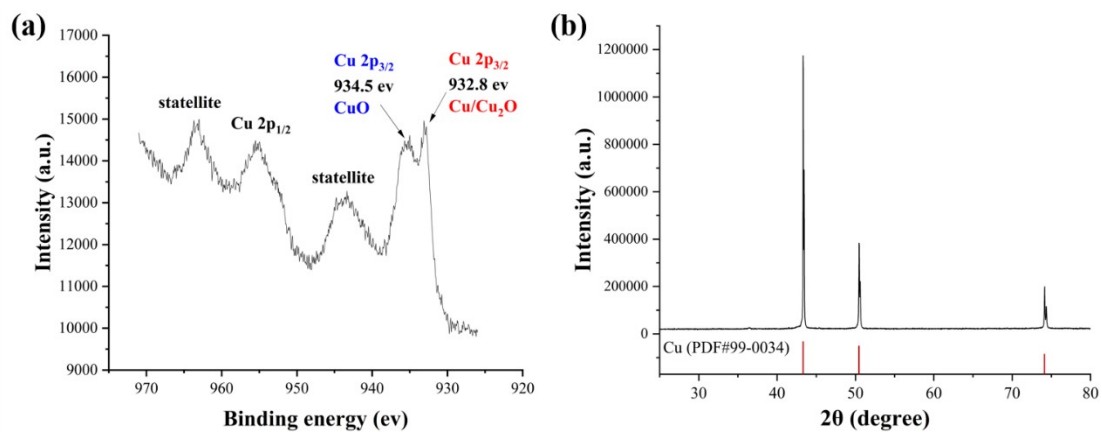

Figure S3 (a) The XPS pattern of Cu powder, (b) XRD pattern of Cu powder.

Table S1 The density of Bulk and Nano-structured Cu<sub>4</sub>TiSe<sub>4</sub> calculated by Archimedes' method.

| Sample                                            | Density (g/cm <sup>3</sup> ) | Theoretical density (g/cm <sup>3</sup> )<br>(calculated by XRD) |
|---------------------------------------------------|------------------------------|-----------------------------------------------------------------|
| Bulk Cu <sub>4</sub> TiSe <sub>4</sub>            | 5.6867                       | 5.699                                                           |
| Nano-structured Cu <sub>4</sub> TiSe <sub>4</sub> | 5.2728                       | 5.702                                                           |
